# Supplementary material for: Risk factors for prolonged length of hospital stay following elective hip replacement surgery: a retrospective longitudinal observational study
Source: HighWire-hosted journal article supplement (doi:10.1136/bmjopen-2023-078108), 2024-08-01
Supplement: bmjopen-2023-078108supp001_data_supplement.pdf [file bmjopen-2023-078108supp001_data_supplement.pdf]

## Supplementary material

- Table S1: OPCS-4 codes used to identify primary hip replacement operations
- Table S2: Sample characteristics for total sample, those with complete data and those with complete data and with a previous admission
- Table S3: Complete table of descriptive statistics for elective admissions for primary hip replacements with complete data
- Table S4: Multivariable models for binary length of stay outcome
- Table S5: Multivariable models for binary medically fit for discharge date outcome
- Table S6: Multivariable models for continuous length of stay outcome
- Figure S1: Forest plot of predictors of binary measure of length of stay (>7 days)
- Figure S2: Forest plot of predictors of continuous length of stay outcome
- Figure S3: Forest plot of predictors of staying in hospital when medically fit for discharge

Supplementary Table S1. OPCS-4 codes used to identify primary hip replacement operations

| Category                      | Code  | Description                                                                      | Notes |
|-------------------------------|-------|----------------------------------------------------------------------------------|-------|
| Primary Total Hip Replacement | W37.1 | Primary total prosthetic replacement of hip joint using cement                   |       |
|                               | W37.8 | Other specified total prosthetic replacement of hip joint using cement           |       |
|                               | W37.9 | Unspecified total prosthetic replacement of hip joint using cement               |       |
|                               | W38.1 | Primary total prosthetic replacement of hip joint not using cement               |       |
|                               | W38.8 | Other specified total prosthetic replacement of hip joint not using cement       |       |
|                               | W38.9 | Unspecified total prosthetic replacement of hip joint not using cement           |       |
|                               | W39.1 | Primary total prosthetic replacement of hip joint NEC                            |       |
|                               | W39.8 | Other specified other total prosthetic replacement of hip joint                  |       |
|                               | W39.9 | Unspecified other total prosthetic replacement of hip joint                      |       |
|                               | W43.1 | Primary total prosthetic replacement of other joint using cement NEC             |       |
|                               | W43.8 | Other specified total prosthetic replacement of other joint using cement NEC     |       |
|                               | W43.9 | Unspecified total prosthetic replacement of other joint using cement NEC         |       |
|                               | W44.1 | Primary total prosthetic replacement of other joint not using cement NEC         |       |
|                               | W44.8 | Other specified total prosthetic replacement of other joint not using cement NEC |       |
|                               | W44.9 | Unspecified total prosthetic replacement of other joint not using cement NEC     |       |
|                               | W45.1 | Other primary total prosthetic replacement of other joint NEC                    |       |
|                               | W45.8 | Other specified total prosthetic replacement of other joint NEC                  |       |
|                               | W45.9 | Unspecified total prosthetic replacement of other joint NEC                      |       |

|       |                                                                                                |
|-------|------------------------------------------------------------------------------------------------|
| W52.1 | Primary prosthetic replacement of articulation of bone using cement NEC                        |
| W52.8 | Other specified prosthetic replacement of articulation of bone using cement NEC                |
| W52.9 | Unspecified prosthetic replacement of articulation of bone using cement NEC                    |
| W53.1 | Primary prosthetic replacement of articulation of bone not using cement NEC                    |
| W53.8 | Other specified prosthetic replacement of articulation of bone not using cement NEC            |
| W53.9 | Unspecified prosthetic replacement of articulation of bone not using cement NEC                |
| W54.1 | Primary prosthetic replacement of articulation of bone NEC                                     |
| W54.8 | Other specified prosthetic replacement of articulation of bone NEC                             |
| W54.9 | Unspecified prosthetic replacement of articulation of bone NEC                                 |
| W93.1 | Primary hybrid prosthetic replacement of hip joint using cemented acetabular component         |
| W93.8 | Other specified hybrid prosthetic replacement of hip joint using cemented acetabular component |
| W93.9 | Unspecified hybrid prosthetic replacement of hip joint using cemented acetabular component     |
| W94.1 | Primary hybrid prosthetic replacement of hip joint using cemented femoral component            |
| W94.8 | Other specified hybrid prosthetic replacement of hip joint using cemented femoral component    |
| W94.9 | Unspecified hybrid prosthetic replacement of hip joint using cemented femoral component        |
| W95.1 | Primary hybrid prosthetic replacement of hip joint using cement NEC                            |
| W95.8 | Other specified hybrid prosthetic replacement of hip joint using cement                        |

|                              |       |                                                                     |                                                         |
|------------------------------|-------|---------------------------------------------------------------------|---------------------------------------------------------|
|                              | W95.9 | Unspecified hybrid prosthetic replacement of hip joint using cement |                                                         |
| Resurfacing / Reconstruction | W58.1 | Primary resurfacing arthroplasty of joint                           | Require combination with site + combination codes to ID |
|                              | W58.8 | Other specified reconstruction of joint                             | Require combination with site + combination codes to ID |
|                              | W58.9 | Unspecified other reconstruction of joint                           | Require combination with site + combination codes to ID |

Supplementary Table S2: Sample characteristics for total sample (N=3036), those with complete data (N=2352), those with complete data and with a previous admission (N=1223) and those with any missing data, ie, non-complete cases (N=1813)

| Main characteristics    |                       | Total sample<br>N=3036 | Complete case<br>sample included<br>in multivariable<br>model with<br>categorical days<br>since last<br>discharge<br>variable<br>N=2352 | Complete case<br>sample included<br>in multivariable<br>model with<br>continuous days<br>since last<br>discharge<br>variable<br>N=1223 | Non-complete<br>cases<br>N=1813 |
|-------------------------|-----------------------|------------------------|-----------------------------------------------------------------------------------------------------------------------------------------|----------------------------------------------------------------------------------------------------------------------------------------|---------------------------------|
| Age, mean (SD)          |                       | 67.4 (13.5)            | 67.5 (13.6)                                                                                                                             | 68.2 (13.7)                                                                                                                            | 66.9 (13.3)                     |
| Sex, N (%)              | Female                | 1793 (59.1)            | 1387 (59.0)                                                                                                                             | 735 (60.1)                                                                                                                             | 1058 (58.4)                     |
|                         | Male                  | 1243 (40.9)            | 965 (41.0)                                                                                                                              | 488 (39.9)                                                                                                                             | 755 (41.6)                      |
| IMD score, N (%)        | 1 (least<br>deprived) | 867 (28.6)             | 679 (28.9)                                                                                                                              | 371 (30.3)                                                                                                                             | 496 (27.4)                      |
|                         | 2                     | 717 (23.6)             | 551 (23.4)                                                                                                                              | 270 (22.1)                                                                                                                             | 447 (24.7)                      |
|                         | 3                     | 519 (17.1)             | 409 (17.4)                                                                                                                              | 203 (16.6)                                                                                                                             | 316 (17.4)                      |
|                         | 4                     | 484 (15.9)             | 381 (16.2)                                                                                                                              | 206 (16.8)                                                                                                                             | 278 (15.3)                      |
|                         | 5 (most<br>deprived)  | 413 (13.6)             | 332 (14.1)                                                                                                                              | 173 (14.2)                                                                                                                             | 240 (13.2)                      |
|                         | (missing)             | 36 (1.2)               | -                                                                                                                                       | -                                                                                                                                      | 36 (2.0)                        |
| Ethnicity, N (%)        | Non-White             | 45 (1.5)               | 37 (1.6)                                                                                                                                | 24 (2.0)                                                                                                                               | 21 (1.2)                        |
|                         | White                 | 1130 (37.2)            | 898 (38.2)                                                                                                                              | 362 (29.6)                                                                                                                             | 1024 (56.5)                     |
|                         | (missing)             | 1861 (61.3)            | 1417 (60.3)                                                                                                                             | 837 (68.4)                                                                                                                             | 768 (42.4)                      |
| Comorbidities, N<br>(%) | 0                     | 1699 (56.0)            | 1298 (55.2)                                                                                                                             | 605 (49.5)                                                                                                                             | 1094 (60.3)                     |
|                         | 1-2                   | 1086 (35.8)            | 857 (36.4)                                                                                                                              | 483 (39.5)                                                                                                                             | 603 (33.3)                      |
|                         | 3-4                   | 213 (7.0)              | 170 (7.2)                                                                                                                               | 118 (9.7)                                                                                                                              | 95 (5.2)                        |
|                         | >=5                   | 38 (1.3)               | 27 (1.2)                                                                                                                                | 17 (1.4)                                                                                                                               | 21 (1.2)                        |

Table S3: Complete table of descriptive statistics for elective admissions for primary hip replacements with complete data (N=2352)

| Variable                    | N (%)       | Proportion (%) admitted >7 days | Mean length of stay (SD)<br>N=2331 | Proportion (%) exceeding medically fit for discharge date |
|-----------------------------|-------------|---------------------------------|------------------------------------|-----------------------------------------------------------|
| Age at admission            |             |                                 |                                    |                                                           |
| 0-34                        | 60 (2.6)    | 15.9                            | 3.8 (2.3)                          | 10.32                                                     |
| 35-44                       | 93 (4.0)    | 6.5                             | 4.1 (3.0)                          | 5.4                                                       |
| 45-54                       | 233 (9.9)   | 6.0                             | 4.0 (2.4)<br>(N=232)               | 4.3                                                       |
| 55-64                       | 440 (18.7)  | 8.6                             | 4.3 (3.0)<br>(N=437)               | 5.9                                                       |
| 65-74                       | 723 (30.7)  | 14.7                            | 5.1 (4.2)<br>(N=718)               | 9.5                                                       |
| 75-84                       | 650 (27.6)  | 27.2                            | 6.6 (4.7)<br>(N=644)               | 13.7                                                      |
| 85+                         | 153 (6.5)   | 51.6                            | 9.6 (5.9)<br>(N=148)               | 39.9                                                      |
| Age at admission, mean (SD) | 67.5 (13.6) | -                               | -                                  | -                                                         |
| Sex                         |             |                                 |                                    |                                                           |
| Female                      | 1387 (59.0) | 20.1                            | 5.1 (3.9)<br>(N=1367)              | 14.0                                                      |
| Male                        | 965 (41.0)  | 15.0                            | 4.7 (3.8)<br>(N=956)               | 7.2                                                       |
| Deprivation (IMD score)     |             |                                 |                                    |                                                           |
| 1 (least deprived)          | 679 (28.9)  | 17.5                            | 5.4 (4.1)<br>(N=674)               | 9.6                                                       |
| 2                           | 551 (23.4)  | 14.7                            | 5.0 (4.1)<br>(N=547)               | 7.4                                                       |
| 3                           | 409 (17.4)  | 17.6                            | 5.4 (3.8)<br>(N=406)               | 11.0                                                      |
| 4                           | 381 (16.2)  | 22.8                            | 6.1 (5.0)<br>(N=377)               | 16.3                                                      |
| 5 (most deprived)           | 332 (14.1)  | 19.6                            | 5.6 (4.6)<br>(N=327)               | 15.1                                                      |

|                                                                                       |              |      |                       |      |
|---------------------------------------------------------------------------------------|--------------|------|-----------------------|------|
| Ethnicity                                                                             |              |      |                       |      |
| Non-White                                                                             | 37 (2.5)     | -    | -                     | -    |
| Asian                                                                                 | 8 (0.6)      | -    | -                     | -    |
| Black                                                                                 | 15 (1.0)     | -    | -                     | -    |
| Mixed                                                                                 | 7 (0.5)      | -    | -                     | -    |
| Other                                                                                 | 7 (0.5)      | -    | -                     | -    |
| White                                                                                 | 1417 (97.5)  | -    | -                     | -    |
| Unknown                                                                               | 898          | -    | -                     | -    |
| Comorbidities (weighted<br>Charlson index)                                            |              |      |                       |      |
| 0                                                                                     | 1298 (55.2)  | 11.7 | 4.7 (3.6)<br>(N=1290) | 8.3  |
| 1-2                                                                                   | 857 (36.4)   | 22.8 | 6.1 (4.6)<br>(N=849)  | 13.3 |
| 3-4                                                                                   | 170 (7.2)    | 37.7 | 7.6 (5.3)<br>(N=166)  | 20.5 |
| >=5                                                                                   | 27 (1.2)     | 48.2 | 8.8 (6.0)<br>(N=26)   | 25.9 |
| Time since last discharge                                                             |              |      |                       |      |
| 0-2 months                                                                            | 341 (14.5)   | 31.1 | 6.9 (5.4)<br>(N=335)  | 20.8 |
| 2-12 months                                                                           | 528 (22.5)   | 21.4 | 5.7 (4.5)<br>(N=518)  | 12.3 |
| 12 months or more                                                                     | 354 (15.1)   | 13.0 | 5.0 (3.7)             | 10.5 |
| never                                                                                 | 1129 (48.0)  | 14.1 | 5.0 (3.9)<br>(N=1124) | 8.0  |
| Emergency over elective<br>admissions ratio<br>(general/acute, monthly),<br>Mean ± SD | 0.8 ± 0.1    | -    | -                     | -    |
| Emergency admissions,<br>daily, Mean ± SD                                             | 153.3 ± 21.4 | -    | -                     | -    |
| Emergency occupied beds,<br>daily, Mean ± SD                                          | 913.3 ± 43.0 | -    | -                     | -    |
| Admission hour category                                                               |              |      |                       |      |

|                    |             |       |                       |       |
|--------------------|-------------|-------|-----------------------|-------|
| 24.00-06.00        | 2 (0.1)     | 100.0 | 28.0 (0)<br>(N=1)     | 100.0 |
| 06.00-12.00        | 2217 (94.3) | 17.4  | 5.4 (4.1)<br>(N=2199) | 10.6  |
| 12.00-18.00        | 124 (5.3)   | 23.4  | 6.3 (6.1)<br>(N=122)  | 16.1  |
| 18.00-24.00        | 9 (0.4)     | 88.9  | 10.9 (3.9)<br>(N=9)   | 66.7  |
| Year of Admission  |             |       |                       |       |
| 2016               | 220 (9.4)   | 17.3  | 5.3 (4.8)<br>(N=217)  | 7.3   |
| 2017               | 752 (32.0)  | 17.6  | 5.5 (4.4)<br>(N=742)  | 10.6  |
| 2018               | 730 (31.0)  | 19.7  | 5.6 (4.2)<br>(N=725)  | 13.7  |
| 2019               | 650 (27.6)  | 16.9  | 5.3 (4.2)<br>(N=647)  | 10.3  |
| Month of Admission |             |       |                       |       |
| January            | 143 (6.1)   | 16.1  | 5.3 (4.9)             | 9.1   |
| February           | 178 (7.6)   | 17.4  | 5.4 (4.0)<br>(N=177)  | 6.2   |
| March              | 196 (8.3)   | 21.4  | 5.7 (4.4)<br>(N=191)  | 10.2  |
| April              | 209 (8.9)   | 18.2  | 5.4 (4.5)<br>(N=206)  | 12.0  |
| May                | 218 (9.3)   | 20.6  | 6.1 (4.3)             | 16.5  |
| June               | 181 (7.7)   | 12.2  | 4.6 (2.7)<br>(N=180)  | 12.7  |
| July               | 195 (8.3)   | 23.1  | 6.2 (5.3)<br>(N=193)  | 17.4  |
| August             | 189 (8.0)   | 18.5  | 5.6 (4.6)<br>(N=186)  | 8.5   |
| September          | 163 (6.9)   | 19.6  | 5.4 (4.1)<br>(N=161)  | 9.2   |
| October            | 238 (10.1)  | 18.5  | 5.6 (4.5)             | 10.9  |



|                                                        |             |       |                      |      |
|--------------------------------------------------------|-------------|-------|----------------------|------|
|                                                        |             |       | (N=236)              |      |
| November                                               | 250 (10.6)  | 13.6  | 4.8 (3.8)<br>(N=249) | 10.0 |
| December                                               | 192 (8.2)   | 17.2  | 5.2 (3.7)<br>(N=191) | 9.9  |
| Day of the Week of Admission                           |             |       |                      |      |
| Sunday                                                 | 4 (0.2)     | 100.0 | 12.0 (3.6)           | 25.0 |
| Monday                                                 | 150 (6.4)   | 22.7  | 5.3 (4.3)<br>(N=147) | 10.7 |
| Tuesday                                                | 621 (26.4)  | 17.6  | 5.2 (4.2)<br>(N=618) | 11.1 |
| Wednesday                                              | 448 (19.1)  | 19.9  | 5.3 (4.6)<br>(N=440) | 11.8 |
| Thursday                                               | 658 (28.0)  | 15.8  | 5.7 (4.0)            | 10.5 |
| Friday                                                 | 408 (17.4)  | 20.1  | 5.9 (4.7)<br>(N=402) | 12.5 |
| Saturday                                               | 63 (2.7)    | 3.2   | 3.4 (1.6)<br>(N=62)  | 6.4  |
| Season of Admission                                    |             |       |                      |      |
| Winter (Dec-Feb)                                       | 513 (21.8)  | 17.0  | 5.3 (4.2)<br>(N=511) | 8.4  |
| Spring (Mar-May)                                       | 623 (26.5)  | 20.1  | 5.7 (4.4)<br>(N=615) | 13.0 |
| Summer (Jun-Aug)                                       | 565 (24.0)  | 18.1  | 5.5 (4.4)<br>(N=559) | 12.9 |
| Autumn (Sep-Nov)                                       | 651 (27.7)  | 16.9  | 5.3 (4.2)<br>(N=646) | 10.1 |
| Spell length of stay, Mean ± SD                        | 5.8 ± 6.3   | -     | -                    | -    |
| Spell length of stay up to 30 days, Mean ± SD (N=2331) | 5.4 ± 4.3   | -     | -                    | -    |
| Patients staying >7 days                               |             |       |                      |      |
| <=7 (no)                                               | 1928 (82.0) | -     | -                    | -    |

|                                                                |             |   |   |   |
|----------------------------------------------------------------|-------------|---|---|---|
| >7 (yes)                                                       | 424 (18.0)  | - | - | - |
| <b>Patients medically fit for discharge (MFFD)</b>             |             |   |   |   |
| with MFFD date before discharge                                | 263 (11.2)  | - | - | - |
| no MFFD date                                                   | 2089 (88.8) | - | - | - |
| <b>Days between MFFD date and Discharge, Mean ± SD (N=263)</b> | 6.2 ± 8.1   | - | - | - |

Table S4: Multivariable models for binary length of stay outcome (admissions &gt; 7 days)

| Variable                                                                 | Multivariable logistic regression (no variable selection)<br>N=2348 |        | Multivariable logistic regression (backwards selection at p=0.1)<br>N=2348 |        |
|--------------------------------------------------------------------------|---------------------------------------------------------------------|--------|----------------------------------------------------------------------------|--------|
|                                                                          | OR (95%CI)                                                          | p      | OR                                                                         | P      |
| <b>Age at admission</b>                                                  | 1.06 (1.05 to 1.07)                                                 | <0.001 | 1.06 (1.05 to 1.08)                                                        | <0.001 |
| <b>Sex (female vs male)</b>                                              | 1.42 (1.12 to 1.81)                                                 | 0.004  | 1.42 (1.12 to 1.81)                                                        | 0.004  |
| <b>IMD score</b>                                                         |                                                                     |        |                                                                            |        |
| 1 (least deprived)                                                       | 1.00                                                                |        | 1.00                                                                       |        |
| 2                                                                        | 0.80 (0.58 to 1.12)                                                 | 0.200  | 0.81 (0.58 to 1.13)                                                        | 0.210  |
| 3                                                                        | 0.88 (0.62 to 1.25)                                                 | 0.467  | 0.88 (0.62 to 1.25)                                                        | 0.478  |
| 4                                                                        | 1.46 (1.04 to 2.06)                                                 | 0.031  | 1.46 (1.04 to 2.05)                                                        | 0.031  |
| 5 (most deprived)                                                        | 1.23 (0.85 to 1.78)                                                 | 0.267  | 1.24 (0.86 to 1.79)                                                        | 0.245  |
| <b>Comorbidities - Charlson index (weighted)</b>                         |                                                                     |        |                                                                            |        |
| 0                                                                        | 1.00                                                                |        | 1.00                                                                       |        |
| 1-2                                                                      | 1.86 (1.45 to 2.39)                                                 | <0.001 | 1.84 (1.43 to 2.36)                                                        | <0.001 |
| 3-4                                                                      | 2.61 (1.77 to 3.86)                                                 | <0.001 | 2.59 (1.76 to 3.82)                                                        | <0.001 |
| >=5                                                                      | 3.79 (1.56 to 9.19)                                                 | 0.003  | 3.52 (1.45 to 8.55)                                                        | 0.005  |
| <b>Time since Last Discharge</b>                                         |                                                                     |        |                                                                            |        |
| 0-2 months                                                               | 1.00                                                                |        | 1.00                                                                       |        |
| 2-12 months                                                              | 0.72 (0.51 to 1.00)                                                 | 0.051  | 0.71 (0.51 to 0.99)                                                        | 0.046  |
| 12 months or more                                                        | 0.34 (0.23 to 0.52)                                                 | <0.001 | 0.35 (0.23 to 0.52)                                                        | <0.001 |
| never                                                                    | 0.44 (0.32 to 0.60)                                                 | <0.001 | 0.44 (0.32 to 0.60)                                                        | <0.001 |
| <b>Emergency over elective admissions ratio (general/acute, monthly)</b> | 0.95 (0.08 to 10.72)                                                | 0.966  | -                                                                          |        |
| <b>NEL admissions, daily (from 01/09/2016)</b>                           | 1.01 (1.00 to 1.02)                                                 | 0.237  | -                                                                          |        |
| <b>NEL occupied beds, daily (from 01/10/2016)</b>                        | 0.996 (0.991 to 1.001)                                              | 0.129  | -                                                                          |        |
| <b>Admission hour category</b>                                           |                                                                     |        |                                                                            |        |
| 06.00-12.00                                                              | 1.00                                                                |        | 1.00                                                                       |        |
| 12.00-18.00                                                              | 1.15 (0.70 to 1.89)                                                 | 0.593  | 1.14 (0.69 to 1.86)                                                        | 0.613  |

|                              |                        |       |                        |       |
|------------------------------|------------------------|-------|------------------------|-------|
| 18.00-06:00                  | 32.71 (3.66 to 292.76) | 0.002 | 29.61 (3.29 to 266.66) | 0.003 |
| Year of Admission            |                        |       |                        |       |
| 2016                         | 1.00                   |       |                        |       |
| 2017                         | 1.15 (0.67 to 1.97)    | 0.602 |                        |       |
| 2018                         | 1.27 (0.69 to 2.32)    | 0.445 |                        |       |
| 2019 (until 31st Dec)        | 1.00 (0.47 to 2.11)    | 0.999 |                        |       |
| Day of the Week of Admission |                        |       |                        |       |
| Sunday                       | -                      |       | -                      | -     |
| Monday                       | 1.00                   |       | 1.00                   | -     |
| Tuesday                      | 0.80 (0.50 to 1.29)    | 0.365 | 0.82 (0.51 to 1.32)    | 0.417 |
| Wednesday                    | 0.91 (0.55 to 1.49)    | 0.702 | 0.93 (0.57 to 1.52)    | 0.768 |
| Thursday                     | 0.60 (0.37 to 0.97)    | 0.036 | 0.62 (0.39 to 1.00)    | 0.050 |
| Friday                       | 0.87 (0.52 to 1.44)    | 0.581 | 0.95 (0.58 to 1.56)    | 0.836 |
| Saturday                     | 0.19 (0.04 to 0.87)    | 0.033 | 0.20 (0.04 to 0.88)    | 0.033 |
| Season of Admission          |                        |       |                        |       |
| Winter (Dec-Feb)             | 1.00                   |       |                        |       |
| Spring (Mar-May)             | 1.18 (0.82 to 1.70)    | 0.363 |                        |       |
| Summer (Jun-Aug)             | 0.89 (0.59 to 1.35)    | 0.579 |                        |       |
| Autumn (Sep-Nov)             | 0.99 (0.67 to 1.46)    | 0.971 |                        |       |
| C-statistic                  | 0.77 (0.75 to 0.79)    |       | 0.77 (0.75 to 0.79)    |       |

Table S5: Multivariable models for binary medically fit for discharge date outcome (MFFD date &lt; discharge date)

| Variable                                                                 | Multivariable logistic regression (no variable selection)<br>N=2352 |        | Multivariable logistic regression (backwards selection at p<0.1)<br>N=2352 |        |
|--------------------------------------------------------------------------|---------------------------------------------------------------------|--------|----------------------------------------------------------------------------|--------|
|                                                                          | OR (95%CI)                                                          | p      | OR (95%CI)                                                                 | p      |
| <b>Age at admission</b>                                                  | 1.06 (1.04 to 1.07)                                                 | <0.001 | 1.06 (1.04 to 1.07)                                                        | <0.001 |
| <b>Sex (female vs male)</b>                                              | 2.10 (1.55 to 2.85)                                                 | <0.001 | 2.06 (1.52 to 2.79)                                                        | <0.001 |
| <b>IMD score</b>                                                         |                                                                     |        |                                                                            |        |
| 1 (least deprived)                                                       | 1.00                                                                |        | 1.00                                                                       |        |
| 2                                                                        | 0.75 (0.48 to 1.15)                                                 | 0.185  | 0.76 (0.49 to 1.16)                                                        | 0.201  |
| 3                                                                        | 1.08 (0.70 to 1.66)                                                 | 0.736  | 1.12 (0.73 to 1.71)                                                        | 0.613  |
| 4                                                                        | 2.06 (1.38 to 3.10)                                                 | <0.001 | 2.11 (1.42 to 3.16)                                                        | <0.001 |
| 5 (most deprived)                                                        | 2.00 (1.31 to 3.06)                                                 | 0.001  | 2.08 (1.37 to 3.16)                                                        | 0.001  |
| <b>Comorbidities - Charlson index (weighted)</b>                         |                                                                     |        |                                                                            |        |
| 0                                                                        | 1.00                                                                |        |                                                                            |        |
| 1-2                                                                      | 1.40 (1.04 to 1.89)                                                 | 0.028  |                                                                            |        |
| 3-4                                                                      | 1.35 (0.84 to 2.18)                                                 | 0.220  |                                                                            |        |
| >=5                                                                      | 1.78 (0.64 to 4.97)                                                 | 0.268  |                                                                            |        |
| <b>Time since Last Discharge</b>                                         |                                                                     |        |                                                                            |        |
| 0-2 months                                                               | 1.00                                                                |        | 1.00                                                                       |        |
| 2-12 months                                                              | 0.60 (0.40 to 0.89)                                                 | 0.011  | 0.56 (0.38 to 0.84)                                                        | 0.004  |
| 12 months or more                                                        | 0.43 (0.27 to 0.69)                                                 | <0.001 | 0.41 (0.26 to 0.65)                                                        | <0.001 |
| never                                                                    | 0.36 (0.25 to 0.52)                                                 | <0.001 | 0.33 (0.23 to 0.47)                                                        | <0.001 |
| <b>Emergency over elective admissions ratio (general/acute, monthly)</b> | 1.86 (0.10 to 33.30)                                                | 0.675  |                                                                            |        |
| <b>NEL admissions, daily (from 01/09/2016)</b>                           | 1.01 (1.00 to 1.02)                                                 | 0.143  | 1.01 (1.00 to 1.02)                                                        | 0.049  |
| <b>NEL occupied beds, daily (from 01/10/2016)</b>                        | 0.99 (0.98 to 0.99)                                                 | <0.001 | 0.99 (0.98 to 0.99)                                                        | <0.001 |
| <b>Admission hour category</b>                                           |                                                                     |        |                                                                            |        |
| 06.00-12.00                                                              | 1.00                                                                |        | 1.00                                                                       |        |
| 12.00-18.00                                                              | 1.50 (0.86 to 2.63)                                                 | 0.152  | 1.55 (0.90 to 2.66)                                                        | 0.114  |

|                              |                        |        |                        |        |
|------------------------------|------------------------|--------|------------------------|--------|
| 18.00-06:00                  | 43.42 (7.94 to 237.33) | <0.001 | 33.00 (7.71 to 141.30) | <0.001 |
| Year of Admission            |                        |        |                        |        |
| 2016                         | 1.00                   |        | 1.00                   |        |
| 2017                         | 2.66 (1.30 to 5.43)    | 0.007  | 2.46 (1.30 to 4.67)    | 0.006  |
| 2018                         | 3.27 (1.49 to 7.14)    | 0.003  | 3.13 (1.62 to 6.04)    | 0.001  |
| 2019 (until 31st Dec)        | 2.55 (1.00 to 6.52)    | 0.051  | 2.42 (1.13 to 5.20)    | 0.023  |
| Day of the Week of Admission |                        |        |                        |        |
| Sunday                       |                        |        |                        |        |
| Monday                       | 1.00                   |        |                        |        |
| Tuesday                      | 1.25 (0.66 to 2.35)    | 0.488  |                        |        |
| Wednesday                    | 1.24 (0.65 to 2.39)    | 0.510  |                        |        |
| Thursday                     | 1.00 (0.53 to 1.87)    | 0.993  |                        |        |
| Friday                       | 1.16 (0.60 to 2.26)    | 0.663  |                        |        |
| Saturday                     | 0.72 (0.20 to 2.64)    | 0.619  |                        |        |
| Season of Admission          |                        |        |                        |        |
| Winter (Dec-Feb)             | 1.00                   |        |                        |        |
| Spring (Mar-May)             | 1.24 (0.79 to 1.94)    | 0.358  |                        |        |
| Summer (Jun-Aug)             | 0.95 (0.58 to 1.58)    | 0.851  |                        |        |
| Autumn (Sep-Nov)             | 1.01 (0.63 to 1.64)    | 0.952  |                        |        |
| C-statistic                  | 0.78 (0.75 to 0.81)    |        | 0.77 (0.74 to 0.80)    |        |

Table S6: Multivariable models for continuous length of stay outcome (< 30 days) in hip surgeries

| Variable                                                          | Multivariable linear regression (no variable selection)<br>N=2331 |        | Multivariable linear regression (backwards selection at p<0.1)<br>N=2331 |        |
|-------------------------------------------------------------------|-------------------------------------------------------------------|--------|--------------------------------------------------------------------------|--------|
|                                                                   | Coef (95%CI)                                                      | p      | Coef (95%CI)                                                             | p      |
| Age at admission                                                  | 0.08 (0.06 to 0.09)                                               | <0.001 | 0.08 (0.06 to 0.09)                                                      | <0.001 |
| Sex (female vs male)                                              | 0.63 (0.31 to 0.95)                                               | <0.001 | 0.63 (0.31 to 0.95)                                                      | <0.001 |
| IMD score                                                         |                                                                   |        |                                                                          |        |
| 1 (least deprived)                                                | 0.00                                                              |        | 0.00                                                                     |        |
| 2                                                                 | -0.33 (-0.75 to 0.10)                                             | 0.134  | -0.32 (-0.75 to 0.10)                                                    | 0.137  |
| 3                                                                 | -0.12 (-0.57 to 0.34)                                             | 0.614  | -0.12 (-0.57 to 0.34)                                                    | 0.616  |
| 4                                                                 | 0.82 (0.26 to 1.38)                                               | 0.004  | 0.80 (0.24 to 1.35)                                                      | 0.005  |
| 5 (most deprived)                                                 | 0.32 (-0.24 to 0.87)                                              | 0.265  | 0.32 (-0.24 to 0.87)                                                     | 0.264  |
| Comorbidities - Charlson index (weighted)                         |                                                                   |        |                                                                          |        |
| 0                                                                 | 0.00                                                              |        | 0.00                                                                     |        |
| 1-2                                                               | 0.98 (0.62 to 1.35)                                               | <0.001 | 0.98 (0.61 to 1.34)                                                      | <0.001 |
| 3-4                                                               | 1.74 (0.93 to 2.56)                                               | <0.001 | 1.74 (0.93 to 2.56)                                                      | <0.001 |
| >=5                                                               | 2.73 (0.71 to 4.75)                                               | 0.008  | 2.68 (0.67 to 4.69)                                                      | 0.009  |
| Time since Last Discharge                                         |                                                                   |        |                                                                          |        |
| 0-2 months                                                        | 0.00                                                              |        | 0.00                                                                     |        |
| 2-12 months                                                       | -0.85 (-1.51 to -0.20)                                            | 0.010  | -0.87 (-1.53 to -0.22)                                                   | 0.009  |
| 12 months or more                                                 | -1.56 (-2.22 to -0.91)                                            | <0.001 | -1.59 (-2.25 to -0.93)                                                   | <0.001 |
| never                                                             | -1.35 (-1.94 to -0.77)                                            | <0.001 | -1.36 (-1.94 to -0.78)                                                   | <0.001 |
| Emergency over elective admissions ratio (general/acute, monthly) | -0.67 (-4.01 to 2.67)                                             | 0.693  | -                                                                        |        |
| NEL admissions, daily (from 01/09/2016)                           | 0.01 (-0.01 to 0.02)                                              | 0.228  | -                                                                        |        |
| NEL occupied beds, daily (from 01/10/2016)                        | -0.01 (-0.01 to 0.00)                                             | 0.074  | -0.004 (-0.008 to 0.001)                                                 | 0.100  |

|                              |                        |       |                        |       |
|------------------------------|------------------------|-------|------------------------|-------|
| Admission hour category      |                        |       |                        |       |
| 06.00-12.00                  | 0.00                   |       | 0.00                   |       |
| 12.00-18.00                  | 0.87 (-0.15 to 1.89)   | 0.095 | 0.84 (-0.18 to 1.85)   | 0.106 |
| 18.00-06:00                  | 6.02 (2.17 to 9.86)    | 0.002 | 5.94 (2.08 to 9.80)    | 0.003 |
| Year of Admission            |                        |       |                        |       |
| 2016                         | 0.00                   |       |                        |       |
| 2017                         | 0.37 (-0.36 to 1.11)   | 0.321 |                        |       |
| 2018                         | 0.33 (-0.49 to 1.16)   | 0.429 |                        |       |
| 2019 (until 31st Dec)        | 0.05 (-0.97 to 1.06)   | 0.930 |                        |       |
| Day of the Week of Admission |                        |       |                        |       |
| Sunday                       |                        |       |                        |       |
| Monday                       | 0.00                   |       | 0.00                   |       |
| Tuesday                      | 0.17 (-0.52 to 0.87)   | 0.623 | 0.21 (-0.48 to 0.90)   | 0.556 |
| Wednesday                    | 0.18 (-0.57 to 0.94)   | 0.630 | 0.19 (-0.56 to 0.93)   | 0.621 |
| Thursday                     | 0.39 (-0.29 to 1.07)   | 0.258 | 0.43 (-0.25 to 1.10)   | 0.215 |
| Friday                       | 0.71 (-0.05 to 1.48)   | 0.068 | 0.79 (0.05 to 1.53)    | 0.037 |
| Saturday                     | -0.99 (-1.91 to -0.07) | 0.036 | -1.04 (-1.85 to -0.22) | 0.013 |
| Season of Admission          |                        |       |                        |       |
| Winter (Dec-Feb)             | 0.00                   |       |                        |       |
| Spring (Mar-May)             | 0.22 (-0.29 to 0.72)   | 0.392 |                        |       |
| Summer (Jun-Aug)             | -0.17 (-0.77 to 0.42)  | 0.569 |                        |       |
| Autumn (Sep-Nov)             | -0.19 (-0.69 to 0.31)  | 0.459 |                        |       |
| R <sup>2</sup>               | 0.157                  |       | 0.154                  |       |



Figure S1: Forest plot of predictors of binary measure of length of stay (>7 days)

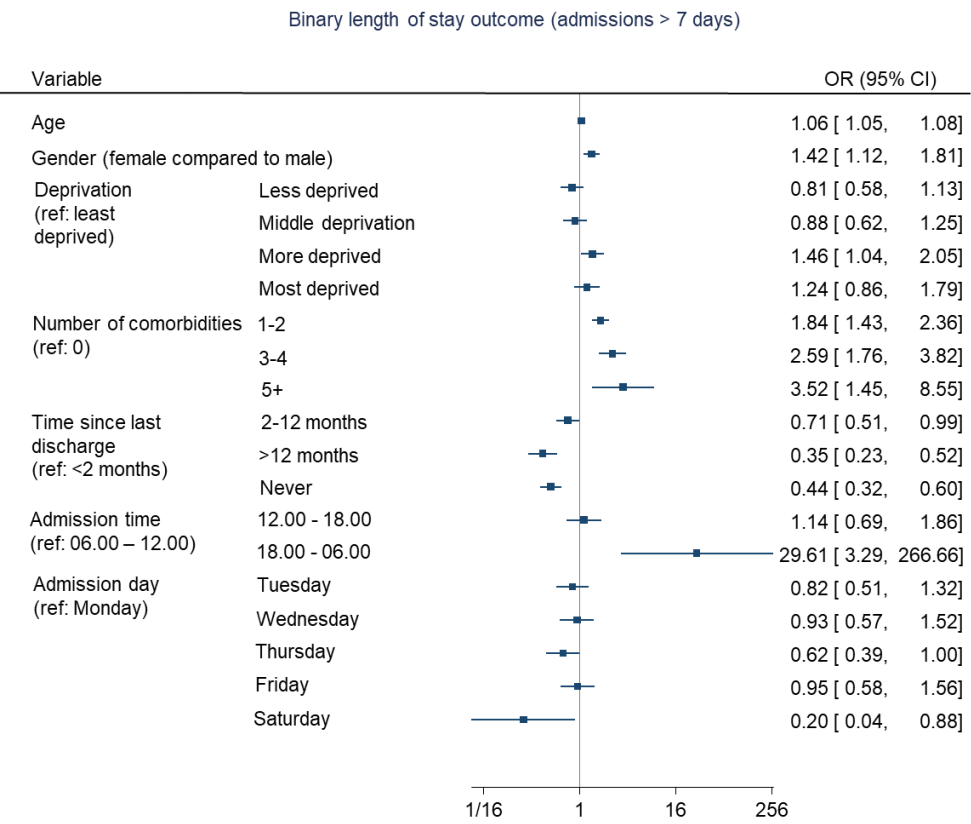

Figure S1: Predictors of binary measure of length of stay (>7 days)

Figure S2: Forest plot of predictors of continuous length of stay outcome

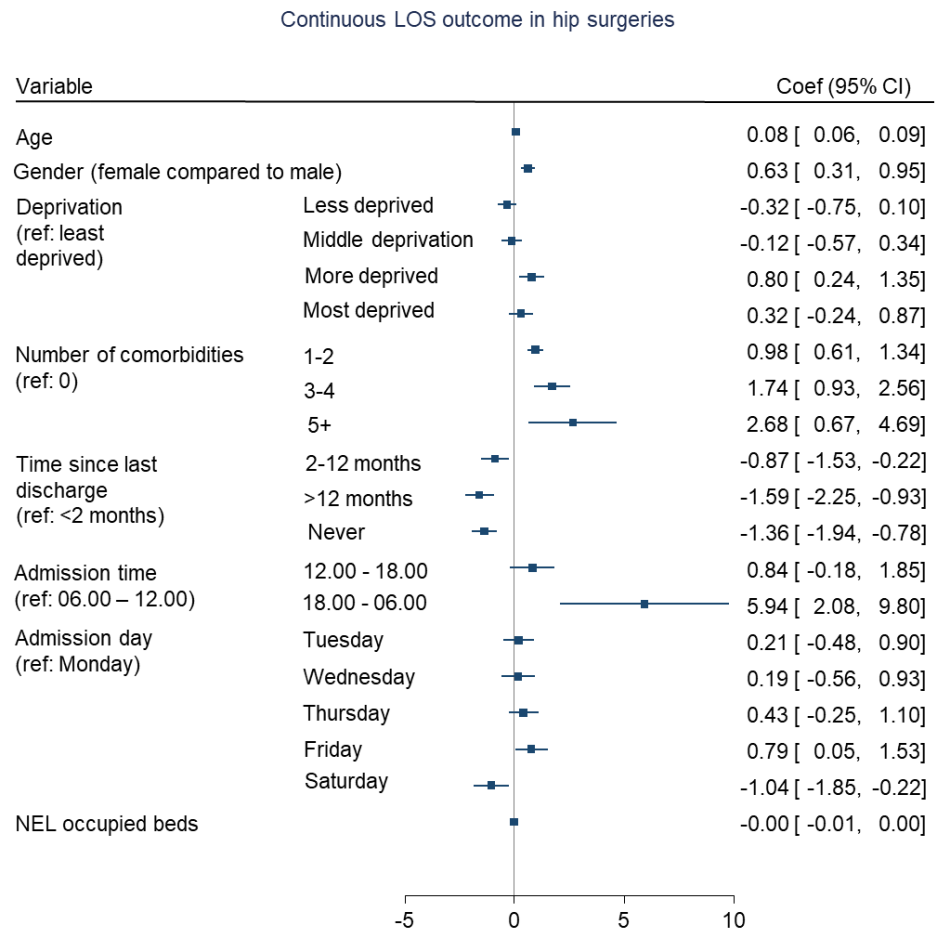

Figure S2: Predictors of length of stay in days

Figure S3: Forest plot of predictors of staying in hospital when medically fit for discharge

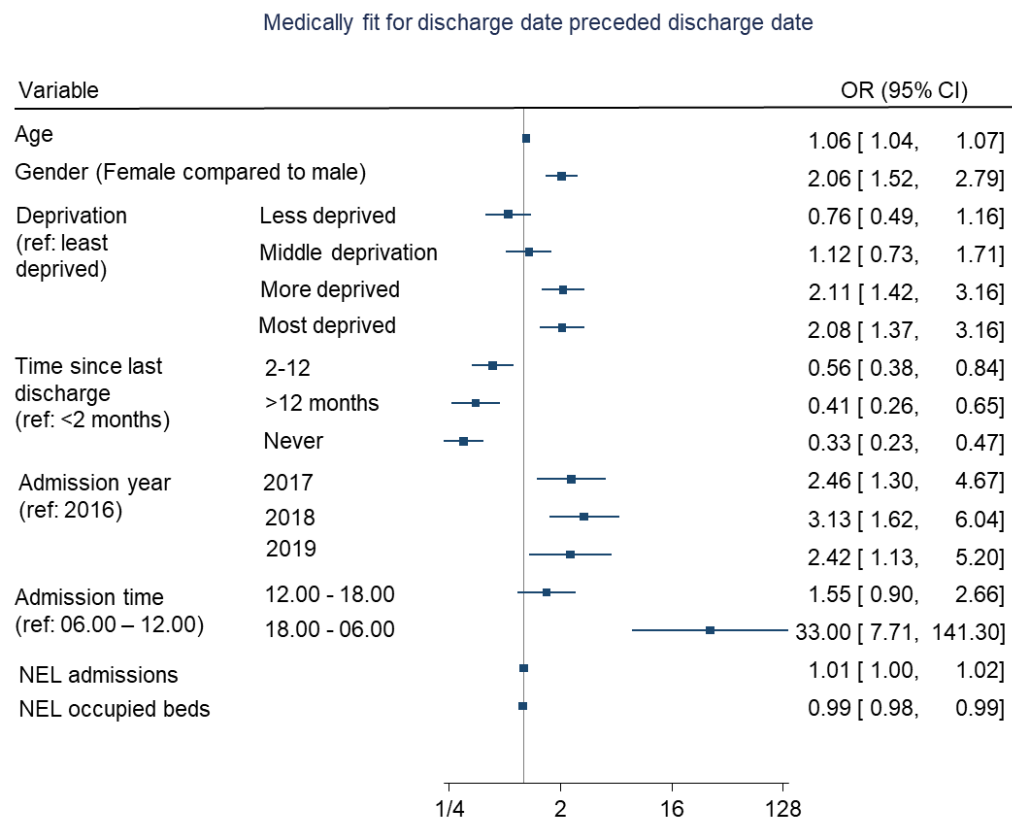

Figure S3: Predictors of staying in hospital when medically fit for discharge
